# Supplementary figures and images for: Hypermethylation of miR-145 promoter-mediated SOX9-CLDN8 pathway regulates intestinal mucosal barrier in Crohn's disease
Source: PubMed Central journal article supplement — eBioMedicine. 2022 Feb 4;76:103846. doi: 10.1016/j.ebiom.2022.103846 (PMC8829091; doi:10.1016/j.ebiom.2022.103846), 2022-02-04

Figure 1

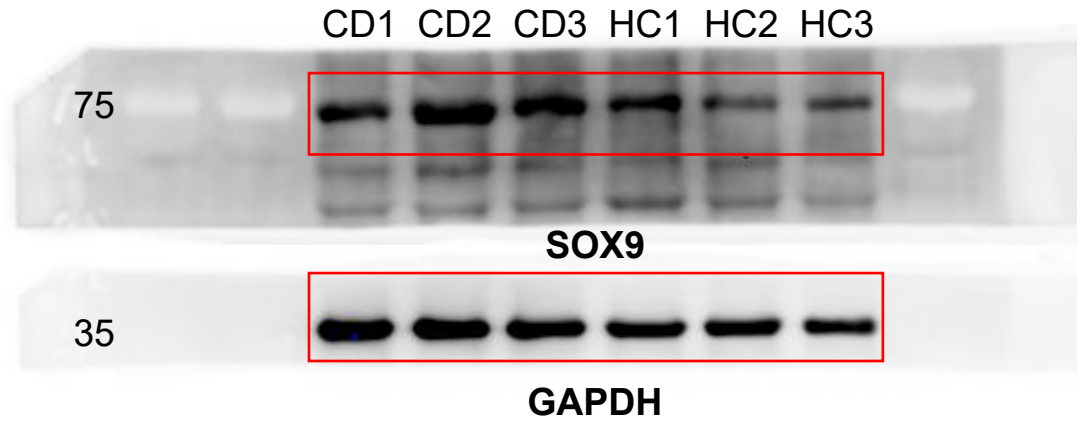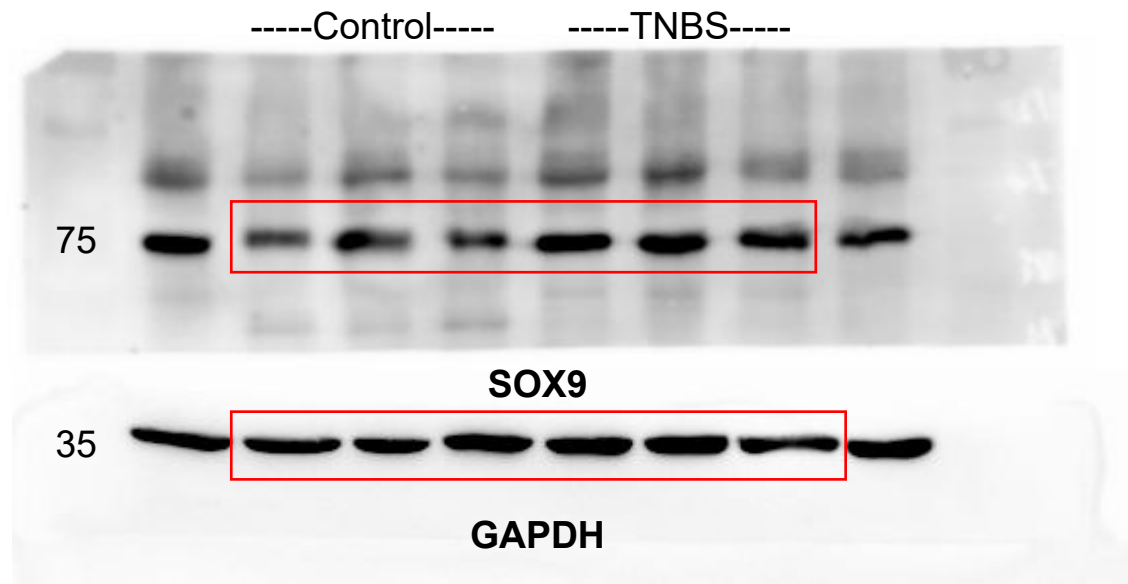

Figure 2 NCM460 cell

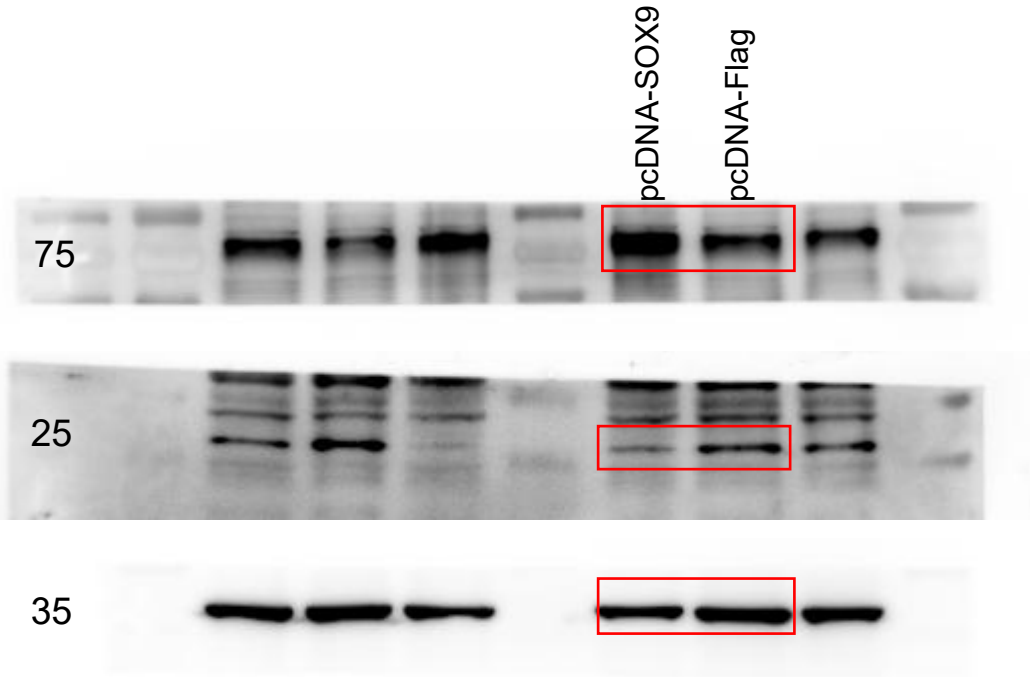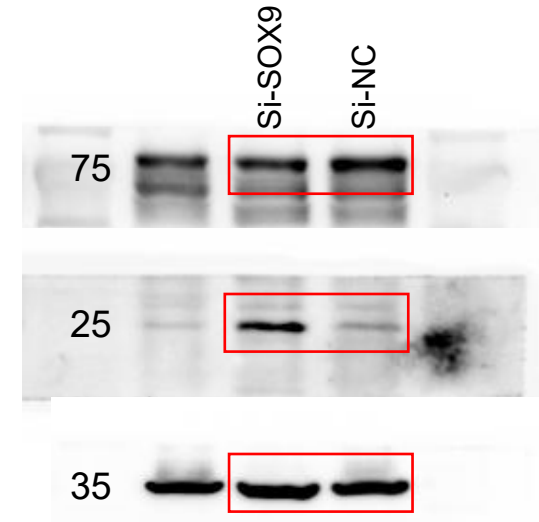

Figure 2 Caco-2 cell

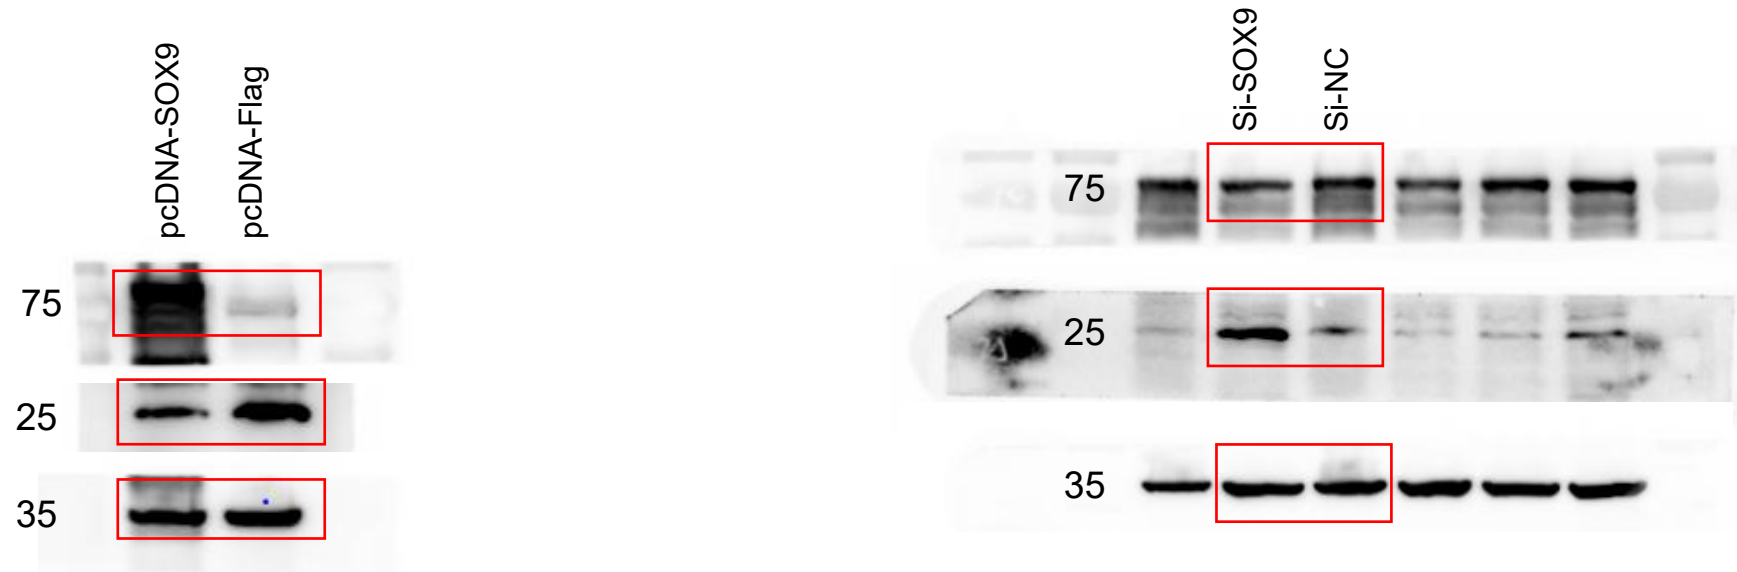

Figure 4

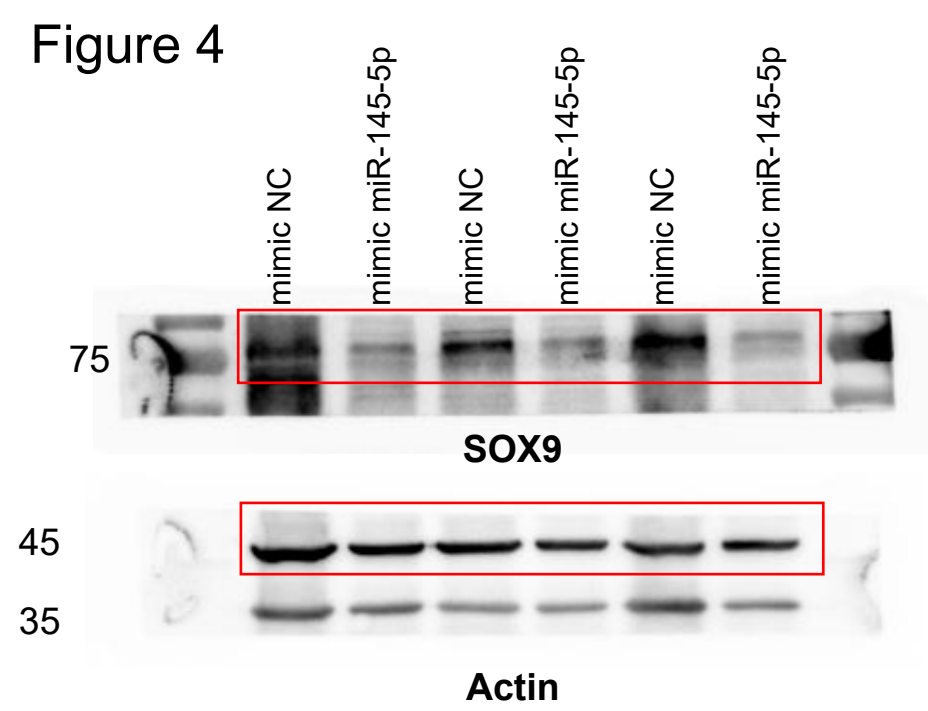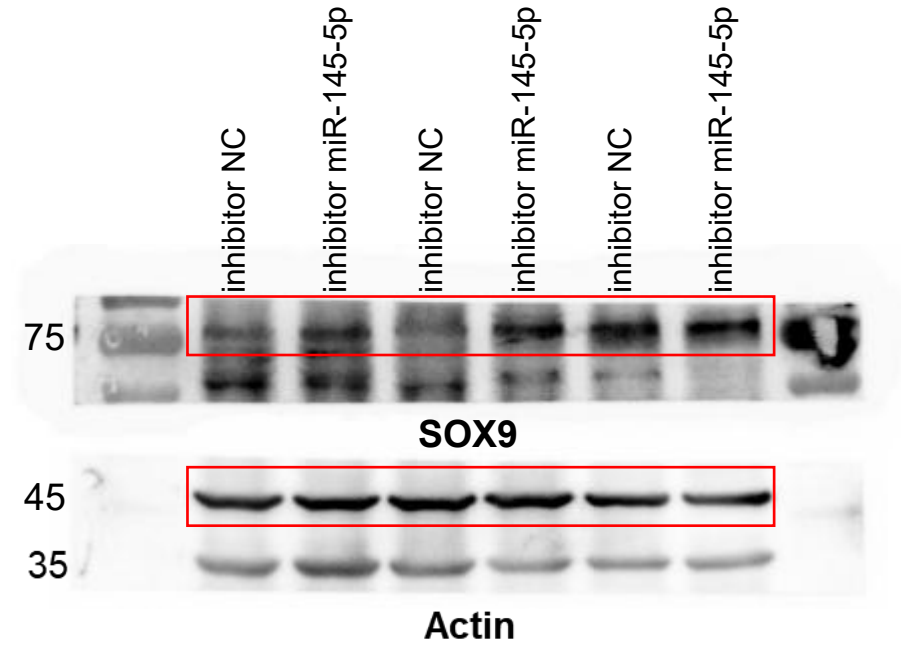

Figure 5

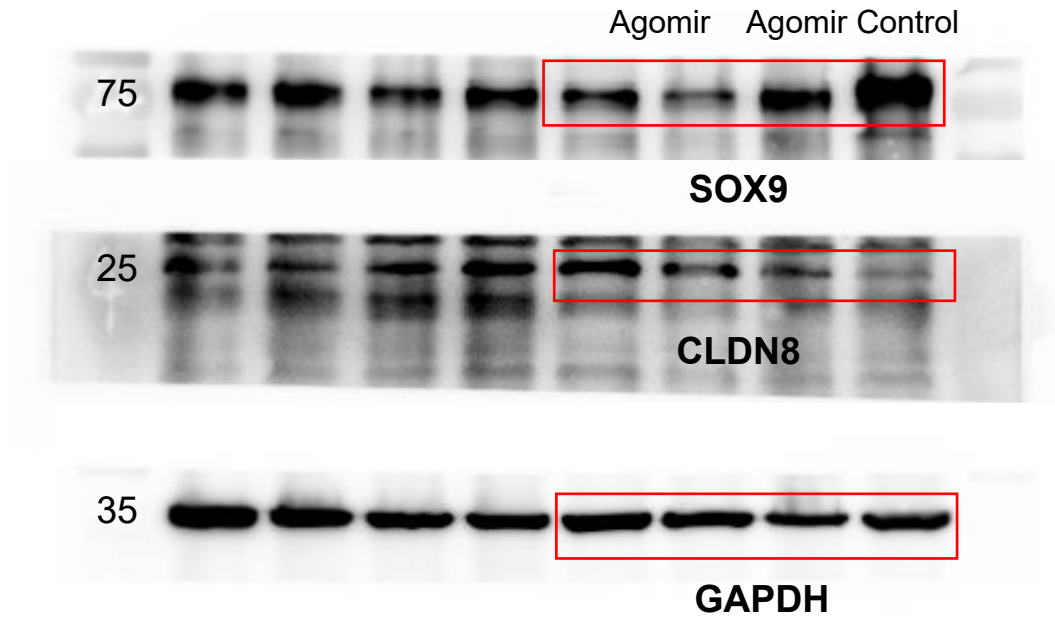

Figure 6

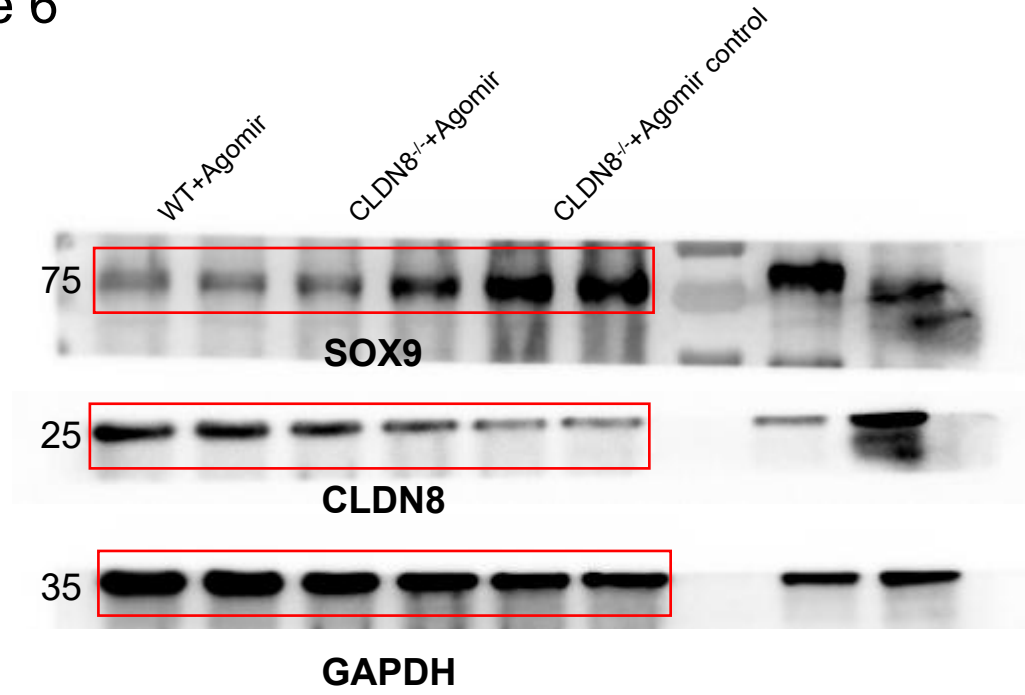

Figure 8

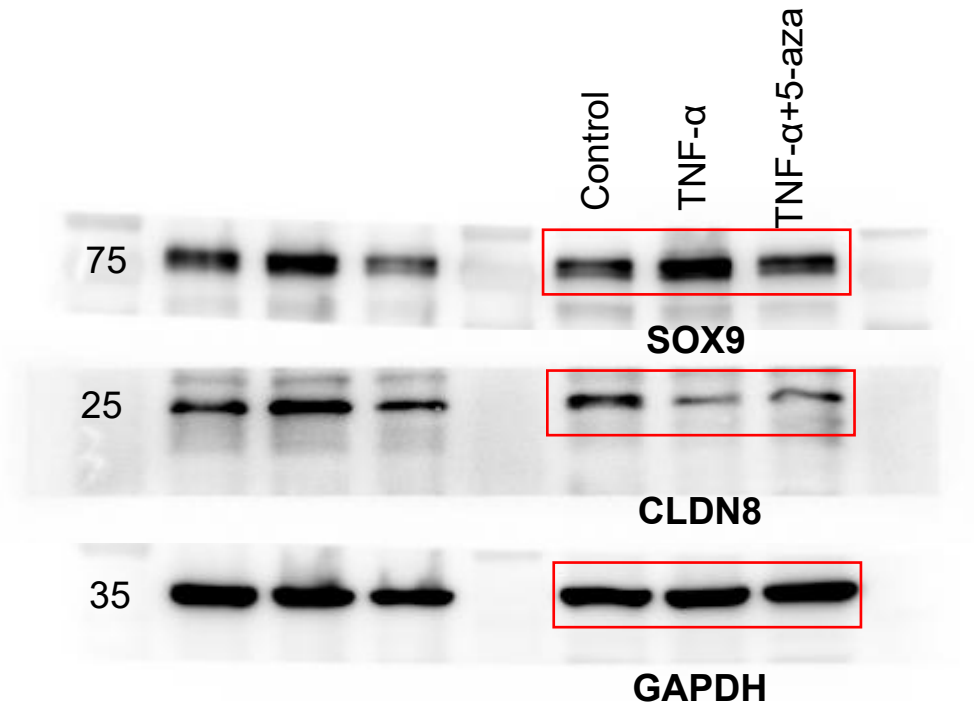

Figure S5

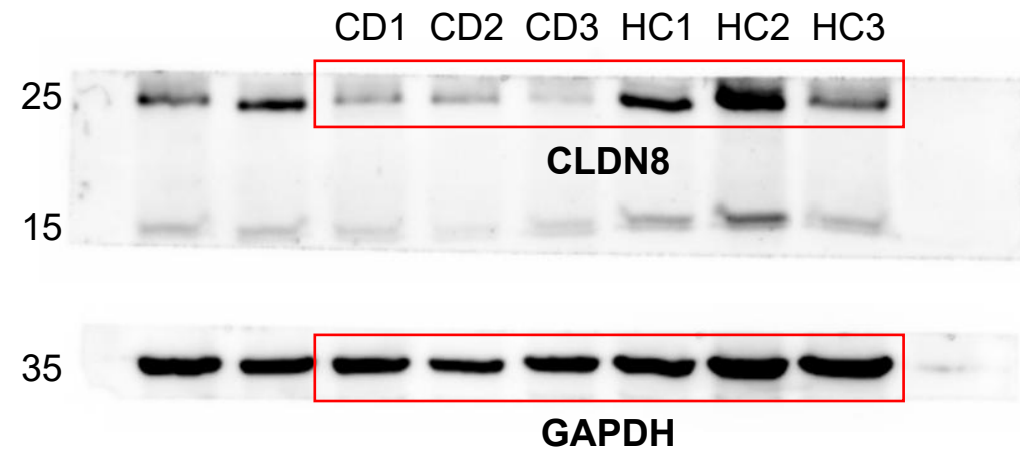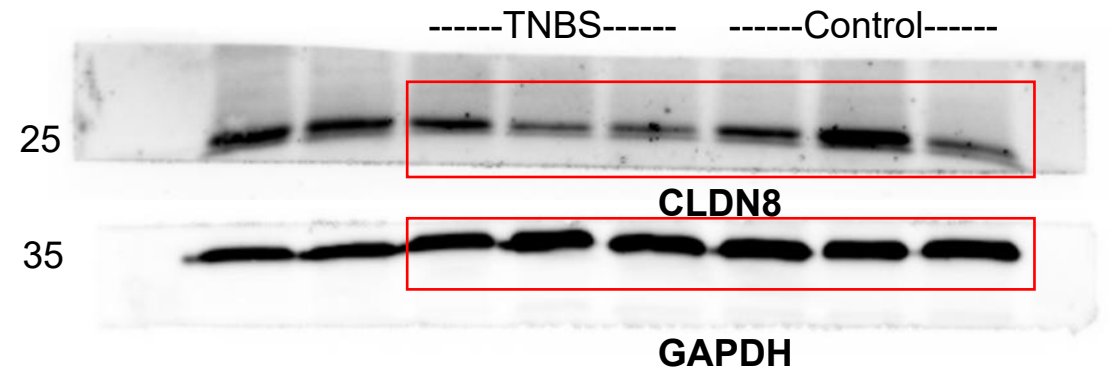

Supplement: mmc4.pdf [file mmc4.pdf]
